# Supplementary material for: Digital health interventions for non-communicable disease management in primary health care in low-and middle-income countries
Source: Springer Nature journal article supplement (doi:10.1038/s41746-023-00764-4), 2023-02-01
Supplement: MOESM1 [file 41746_2023_764_MOESM1_ESM.pdf]

**Supplementary Table 1: Preferred reporting items for systematic reviews and meta-analyses extension for scoping reviews (PRISMA-ScR) checklist**

| SECTION                                               | ITEM | PRISMA-ScR CHECKLIST ITEM                                                                                                                                                                                                                                                                                  | REPORTED ON PAGE #      |
|-------------------------------------------------------|------|------------------------------------------------------------------------------------------------------------------------------------------------------------------------------------------------------------------------------------------------------------------------------------------------------------|-------------------------|
| <b>TITLE</b>                                          |      |                                                                                                                                                                                                                                                                                                            |                         |
| Title                                                 | 1    | Identify the report as a scoping review.                                                                                                                                                                                                                                                                   | Page 1                  |
| <b>ABSTRACT</b>                                       |      |                                                                                                                                                                                                                                                                                                            |                         |
| Structured summary                                    | 2    | Provide a structured summary that includes (as applicable): background, objectives, eligibility criteria, sources of evidence, charting methods, results, and conclusions that relate to the review questions and objectives.                                                                              | Page 2                  |
| <b>INTRODUCTION</b>                                   |      |                                                                                                                                                                                                                                                                                                            |                         |
| Rationale                                             | 3    | Describe the rationale for the review in the context of what is already known. Explain why the review questions/objectives lend themselves to a scoping review approach.                                                                                                                                   | Page 3                  |
| Objectives                                            | 4    | Provide an explicit statement of the questions and objectives being addressed with reference to their key elements (e.g., population or participants, concepts, and context) or other relevant key elements used to conceptualize the review questions and/or objectives.                                  | Page 3-4                |
| <b>METHODS</b>                                        |      |                                                                                                                                                                                                                                                                                                            |                         |
| Protocol and registration                             | 5    | Indicate whether a review protocol exists; state if and where it can be accessed (e.g., a Web address); and if available, provide registration information, including the registration number.                                                                                                             | NA                      |
| Eligibility criteria                                  | 6    | Specify characteristics of the sources of evidence used as eligibility criteria (e.g., years considered, language, and publication status), and provide a rationale.                                                                                                                                       | Page 4                  |
| Information sources*                                  | 7    | Describe all information sources in the search (e.g., databases with dates of coverage and contact with authors to identify additional sources), as well as the date the most recent search was executed.                                                                                                  | Page 4                  |
| Search                                                | 8    | Present the full electronic search strategy for at least 1 database, including any limits used, such that it could be repeated.                                                                                                                                                                            | Page 4, Appendix 2      |
| Selection of sources of evidence†                     | 9    | State the process for selecting sources of evidence (i.e., screening and eligibility) included in the scoping review.                                                                                                                                                                                      | Page 4                  |
| Data charting process‡                                | 10   | Describe the methods of charting data from the included sources of evidence (e.g., calibrated forms or forms that have been tested by the team before their use, and whether data charting was done independently or in duplicate) and any processes for obtaining and confirming data from investigators. | Page 5                  |
| Data items                                            | 11   | List and define all variables for which data were sought and any assumptions and simplifications made.                                                                                                                                                                                                     | Page 5                  |
| Critical appraisal of individual sources of evidence§ | 12   | If done, provide a rationale for conducting a critical appraisal of included sources of evidence; describe the methods used and how this information was used in any data synthesis (if appropriate).                                                                                                      | Page 5                  |
| Synthesis of results                                  | 13   | Describe the methods of handling and summarizing the data that were charted.                                                                                                                                                                                                                               | Page 5-6                |
| <b>RESULTS</b>                                        |      |                                                                                                                                                                                                                                                                                                            |                         |
| Selection of sources of evidence                      | 14   | Give numbers of sources of evidence screened, assessed for eligibility, and included in the review, with reasons for exclusions at each stage, ideally using a flow diagram.                                                                                                                               | Page 7                  |
| Characteristics of sources of evidence                | 15   | For each source of evidence, present characteristics for which data were charted and provide the citations.                                                                                                                                                                                                | Page 8                  |
| Critical appraisal within sources of evidence         | 16   | If done, present data on critical appraisal of included sources of evidence (see item 12).                                                                                                                                                                                                                 | Page 8, Appendix 4      |
| Results of individual sources of evidence             | 17   | For each included source of evidence, present the relevant data that were charted that relate to the review questions and objectives.                                                                                                                                                                      | Page 8-17, Appendix 3-4 |
| Synthesis of results                                  | 18   | Summarize and/or present the charting results as they relate to the review questions and objectives.                                                                                                                                                                                                       | Page 8-17               |
| <b>DISCUSSION</b>                                     |      |                                                                                                                                                                                                                                                                                                            |                         |
| Summary of evidence                                   | 19   | Summarize the main results (including an overview of concepts, themes, and types of evidence available), link to the review questions and objectives, and consider the relevance to key groups.                                                                                                            | Page 18                 |
| Limitations                                           | 20   | Discuss the limitations of the scoping review process.                                                                                                                                                                                                                                                     | Page 20                 |
| Conclusions                                           | 21   | Provide a general interpretation of the results with respect to the review questions and objectives, as well as potential implications and/or next steps.                                                                                                                                                  | Page 21                 |
| <b>FUNDING</b>                                        |      |                                                                                                                                                                                                                                                                                                            |                         |
| Funding                                               | 22   | Describe sources of funding for the included sources of evidence, as well as sources of funding for the scoping review. Describe the role of the funders of the scoping review.                                                                                                                            | Page 21                 |

JB I = Joanna Briggs Institute; PRISMA-ScR = Preferred Reporting Items for Systematic reviews and Meta-Analyses extension for Scoping Reviews.

\* Where *sources of evidence* (see second footnote) are compiled from, such as bibliographic databases, social media platforms, and Web sites.

† A more inclusive/heterogeneous term used to account for the different types of evidence or data sources (e.g., quantitative and/or qualitative research, expert opinion, and policy documents) that may be eligible in a scoping review as opposed to only studies. This is not to be confused with *information sources* (see first footnote).

‡ The frameworks by Arksey and O'Malley (6) and Levac and colleagues (7) and the JB I guidance (4, 5) refer to the process of data extraction in a scoping review as data charting.

§ The process of systematically examining research evidence to assess its validity, results, and relevance before using it to inform a decision. This term is used for items 12 and 19 instead of "risk of bias" (which is more applicable to systematic reviews of interventions) to include and acknowledge the various sources of evidence that may be used in a scoping review (e.g., quantitative and/or qualitative research, expert opinion, and policy document).

From: Tricco AC, Lillie E, Zarin W, O'Brien KK, Colquhoun H, Levac D, et al. PRISMA Extension for Scoping Reviews (PRISMA ScR): Checklist and Explanation. *Ann Intern Med*. 2018;169:467–473. doi: [10.7326/M18-0850](https://doi.org/10.7326/M18-0850).

## **Supplementary Notes 1: Search syntax on Pubmed, Embase, and Web of Science**

Note: specific search syntax with subject headings were customized based on requirements of each database, including Pubmed (using “title/abstract”), Embase (using “title/abstract/keywords”), and Web of Science (using “topic”).

### **Group A-Digital health related:**

"digital health" OR "dhealth" OR "d-health" OR "ehealth" OR "electronic health" OR "e-health" OR "mhealth" OR "mobile health" OR "m-health" OR "telehealth" OR "teletherapy" OR "tele-therapy" OR "tele-intervention" OR "teleintervention" OR "telecare" or "tele-care" OR "EHR" OR "electronic health record" OR "electronic medical record" OR "EMR" OR "blood pressure monitoring" OR "bp monitoring" OR "information communication technology" OR "ICT" OR "short-message service" OR "sms" OR "smart phone" OR "cell phone" OR "cell-phone" OR "feature phone" OR "mobile phone" OR "telephone" OR "app" OR "wireless health" or "healthcare technology" OR "medical information system" OR "telemonitoring" OR "tele-monitoring" OR "telepresence" OR "tele-presence" OR "electronic health information" OR "teleconsultation" OR "tele-consultation" OR "e-rehabilitation" OR "personal digital assistant" OR "text-message"

AND

### **Group B-Non-communicable disease related:**

"hypertension" OR "HTN" OR "blood pressure" OR "diabetes" OR "heart disease" OR "stroke" OR "cerebrovascular disease" OR "CVD" OR "cardiovascular disease" OR "non-communicable" OR "NCD" OR "chronic disease" OR "non-infectious disease" OR "cardiometabolic disease" OR "CMD" OR "cardiometabolic condition" OR "cardiometabolic patient" OR "metabolic syndrome"

AND

### **Group C-Primary health care related:**

"PHC" OR "primary health care" OR "primary healthcare" OR "primary care" OR "primary health" OR "basic healthcare" OR "essential healthcare" OR "healthcare at the grassroot level"

Time frame: 2010.01.01~2021.04.30

**Supplementary Table 2: Data extraction on basic characteristics of the 31 included reviews**

| First Author,<br>Year   | Name of publication                                                                                                                                                             | Review type                               | Number of<br>reviewed studies | Types of reviewed studies                                                                          | Range of sample size<br>of reviewed studies |
|-------------------------|---------------------------------------------------------------------------------------------------------------------------------------------------------------------------------|-------------------------------------------|-------------------------------|----------------------------------------------------------------------------------------------------|---------------------------------------------|
| Agarwal R 2011          | Role of Home Blood Pressure Monitoring in Overcoming Therapeutic Inertia and Improving Hypertension Control A Systematic Review and Meta-Analysis                               | Systematic review<br>(with meta-analysis) | 37                            | Randomized controlled trials (RCTs)                                                                | 15-1,325                                    |
| de Jongh T 2012         | Mobile phone messaging for facilitating self-management of long-term illnesses                                                                                                  | Systematic review                         | 6                             | RCTs                                                                                               | 16-67                                       |
| Baron J 2012            | The impact of mobile monitoring technologies on glycosylated hemoglobin in diabetes: a systematic review                                                                        | Systematic review                         | 20                            | RCTs, single-group pre and post                                                                    | 10-328                                      |
| Mair FS 2012            | Factors that promote or inhibit the implementation of e-health systems: an explanatory systematic review                                                                        | Umbrella review                           | 37                            | Systematic reviews, narrative reviews, qualitative meta-syntheses or meta-ethnographies            | NA                                          |
| Buhi ER 2013            | Mobile phone-based behavioural interventions for health: A systematic review                                                                                                    | Systematic review                         | 34                            | RCTs, quasi-experiment studies                                                                     | 10-1,705                                    |
| El-Gayar O 2013         | A systematic review of IT for diabetes self-management: Are we there yet?                                                                                                       | Systematic review                         | 104                           | RCTs, cluster-RCT                                                                                  | 6-2,924                                     |
| Bloomfield GS<br>2014   | Mobile health for non-communicable diseases in Sub-Saharan Africa: a systematic review of the literature and strategic framework for research                                   | Systematic review                         | 5                             | Chart review, single center report, prospective study, uncontrolled trials                         | 22-1,160                                    |
| Nhavoto JA 2014         | Mobile technologies and geographic information systems to improve health care systems: a literature review                                                                      | Non-specified review<br>type              | 271                           | Peer-reviewed papers and conference proceedings with no specified types                            | 5-5,800                                     |
| Zapata BC 2015          | Empirical studies on usability of mHealth apps: a systematic literature review                                                                                                  | Systematic review                         | 22                            | Empirical studies                                                                                  | NA                                          |
| Beratarrechea A<br>2016 | Use of m-Health Technology for Preventive Interventions to Tackle Cardiometabolic Conditions and Other Non-Communicable Diseases in Latin America- Challenges and Opportunities | Systematic review                         | 9                             | RCTs, cluster-RCT, quasi-experimental (pre-post) studies, quasi-experimental and qualitative study | 172-1,950                                   |
| Beishuizen CRL<br>2016  | Web-Based Interventions Targeting Cardiovascular Risk Factors in Middle-Aged and Older People: A Systematic Review and Meta-Analysis                                            | Systematic review<br>(with meta-analysis) | 57                            | RCTs                                                                                               | 61-2,140                                    |
| Hsu J 2016              | The top Chinese mobile health apps: a systematic investigation                                                                                                                  | Non-specified review<br>type              | 234                           | Mobile phone applications                                                                          | NA                                          |
| Hou C 2016              | Do mobile phone applications improve glycemic control (HbA1c) in the self-management of diabetes? A systematic review, meta-analysis, and grade of 14 randomized trials         | Systematic review<br>(with meta-analysis) | 14                            | RCTs                                                                                               | 7-67                                        |
| Lewis J 2016            | Recent worldwide developments in eHealth and mHealth to more effectively manage cancer and other chronic diseases—a systematic review                                           | Umbrella review                           | 15                            | Systematic reviews, narrative reviews                                                              | 10-5,800                                    |
| Cajita MI 2016          | A systematic review of mHealth-based heart failure interventions                                                                                                                | Systematic review                         | 10                            | RCTs, quasi-experimental studies                                                                   | 6-710                                       |
| Müller AM 2016          | The effectiveness of e- & mHealth interventions to promote physical activity and healthy diets in developing countries: a systematic review                                     | Systematic review                         | 16                            | RCTs, quasi-experimental trials                                                                    | 22-69,219                                   |

|                           |                                                                                                                                                                                            |                                        |     |                                                                                                               |           |
|---------------------------|--------------------------------------------------------------------------------------------------------------------------------------------------------------------------------------------|----------------------------------------|-----|---------------------------------------------------------------------------------------------------------------|-----------|
| Kebede MM 2017            | Characterizing active ingredients of eHealth interventions targeting persons with poorly controlled type 2 diabetes mellitus using the behavior change techniques taxonomy: scoping review | Scoping review                         | 32  | RCTs                                                                                                          | 18-379    |
| Miller L 2017             | Mobile technology interventions for asthma self-management: systematic review and meta-analysis                                                                                            | Systematic review (with meta-analysis) | 11  | RCTs                                                                                                          | 16-288    |
| Njoroge M 2017            | Assessing the feasibility of eHealth and mHealth: a systematic review and analysis of initiatives implemented in Kenya                                                                     | Systematic review                      | 69  | RCTs, quasi-experimental studies, cross-sectional studies, cohort studies, qualitative studies                | NA        |
| Wang Y 2017               | A systematic review of application and effectiveness of mHealth interventions for obesity and diabetes treatment and self-management                                                       | Systematic review                      | 24  | RCTs, quasi-experiments                                                                                       | 15-124    |
| Kim BY 2017               | Smart devices for older adults managing chronic disease: a scoping review                                                                                                                  | Scoping review                         | 51  | Pre-experimental design studies, RCTs, qualitative studies, quasi-experimental studies, mixed methods studies | 4-471     |
| Watkins JA 2018           | mHealth text and voice communication for monitoring people with chronic diseases in low-resource settings: a realist review                                                                | Systematic review                      | 4   | RCTs                                                                                                          | 162-1,188 |
| Byambasuren O 2018        | Prescribable mHealth apps identified from an overview of systematic reviews                                                                                                                | Umbrella review                        | 6   | Systematic reviews                                                                                            | 17-1,929  |
| Marcolino MS 2018         | The impact of mHealth interventions: systematic review of systematic reviews                                                                                                               | Umbrella review                        | 23  | Systematic reviews                                                                                            | 9-107     |
| Lu X 2019                 | Interactive mobile health intervention and blood pressure management in adults: a meta-analysis of randomized controlled trials                                                            | Systematic review (with meta-analysis) | 11  | RCTs                                                                                                          | NA        |
| Dounavi K 2019            | Mobile health applications in weight management: a systematic literature review                                                                                                            | Systematic review                      | 39  | RCTs, Non-randomized trials                                                                                   | NA        |
| Almutairi N 2020          | The effectiveness of patient activation intervention on type 2 diabetes mellitus glycemic control and self-management behaviors: A systematic review of RCTs                               | Systematic review                      | 10  | RCTs                                                                                                          | 120-711   |
| Godinho MA 2020           | mHealth for integrated people-centred health services in the Western Pacific: a systematic review                                                                                          | Systematic review                      | 39  | RCTs, cross-sectional studies, qualitative studies, quasi-experiments, diagnostic test accuracy studies       | 6-7,421   |
| Gonçalves-Bradley DC 2020 | Mobile technologies to support healthcare provider to healthcare provider communication and management of care                                                                             | Systematic review (with meta-analysis) | 19  | Randomized trials, conference abstracts                                                                       | 85-5423   |
| McNatt ZZ 2020            | McNatt ZZ. Addressing noncommunicable diseases among urban refugees in the Middle East and North Africa-a scoping review                                                                   | Scoping review                         | 11  | Policy evaluation, mixed-method studies, cohort studies, descriptive study                                    | NA        |
| Pai RR 2021               | Bibliometric analysis and methodological review of mobile health services and applications in India                                                                                        | Systematic review                      | 158 | Not specified                                                                                                 | NA        |

**Supplementary Table 3: Data extraction on basic characteristics of the 21 included trials**

| First Author,<br>Year   | Name of publication                                                                                                                                                                                      | Trial type                                              | Study country | Disease types                                                | Sample size                    | Quality<br>assessment |
|-------------------------|----------------------------------------------------------------------------------------------------------------------------------------------------------------------------------------------------------|---------------------------------------------------------|---------------|--------------------------------------------------------------|--------------------------------|-----------------------|
| dos Santos<br>MVR 2013  | A Telehealth Strategy for Increasing Adherence in the Treatment of Hypertension in Primary Care                                                                                                          | Quasi-experiment<br>(pre-post)                          | Brazil        | Hypertension                                                 | 502 patients and 21<br>doctors | Sub-optimal           |
| Tian M 2015             | A cluster-randomized, controlled trial of a simplified multifaceted management program for individuals at high cardiovascular risk (SimCard trial) in rural Tibet, China, and Haryana, India             | Cluster-randomized<br>controlled trial<br>(Cluster-RCT) | China, India  | People with high<br>cardiovascular risks                     | 2,086                          | Good                  |
| Bobrow K 2016           | Mobile Phone Text Messages to Support Treatment Adherence in Adults With High Blood Pressure (SMS-Text Adherence Support [StAR]): A Single-Blind, Randomized Trial                                       | Randomized<br>controlled trial (RCT)                    | South Africa  | Hypertension                                                 | 1,372                          | Good                  |
| Ajay VS 2016            | Development of a Smartphone-Enabled Hypertension and Diabetes Mellitus Management Package to Facilitate Evidence-Based Care Delivery in Primary Healthcare Facilities in India: The mPower Heart Project | Quasi-experiment<br>(pre-post)                          | India         | Hypertension and diabetes                                    | 6,979                          | Sub-optimal           |
| Fernandes BSM<br>2016   | Evaluation of the telephone intervention in the promotion of diabetes self-care: a randomized clinical trial                                                                                             | RCT                                                     | Brazil        | Diabetes                                                     | 210                            | Good                  |
| Maia JX 2016            | The impact of a clinical decision support system in diabetes primary care patients in a developing country                                                                                               | Quasi-experiment<br>(pre-post)                          | Brazil        | Diabetes                                                     | 145                            | Sub-optimal           |
| Diehl LA 2017           | InsuOnline, an Electronic Game for Medical Education on Insulin Therapy: A Randomized Controlled Trial With Primary Care Physicians                                                                      | RCT                                                     | Brazil        | Diabetes                                                     | 134 doctors                    | Good                  |
| Varleta P 2017          | Mobile phone text messaging improves antihypertensive drug adherence in the community                                                                                                                    | RCT                                                     | Chile         | Hypertension                                                 | 314                            | Fair                  |
| Kleczka B 2018          | Rubber stamp templates for improving clinical documentation: A paper-based, m-Health approach for quality improvement in low-resource settings                                                           | Quasi-experiment<br>(pre-post)                          | Kenya         | Hypertension, diabetes,<br>chronic respiratory diseases      | 70                             | Sub-optimal           |
| Nascimento BR<br>2018   | Integration of echocardiographic screening by non-physicians with remote reading in primary care                                                                                                         | Feasibility/pilot study                                 | Brazil        | Asymptomatic patients<br>referred for clinical<br>indication | 1,004                          | Sub-optimal           |
| Visanuyothin S<br>2018  | An integrated program with home blood-pressure monitoring and village health volunteers for treating poorly controlled hypertension at the primary care level in an urban community of Thailand          | Quasi-experiment                                        | Thailand      | Hypertension                                                 | 122                            | Sub-optimal           |
| Beratarrechea A<br>2019 | Using mHealth Tools to Improve Access and Coverage of People With Public Health Insurance and High Cardiovascular Disease Risk in Argentina: A Pragmatic Cluster Randomized Trial                        | Cluster-RCT                                             | Argentina     | Diabetes mellitus,<br>hypertension,<br>hypercholesterolemia  | 755                            | Good                  |
| Menezes P<br>2019       | Use of a Mobile Phone App to Treat Depression Comorbid With Hypertension or Diabetes: A Pilot Study in Brazil and Peru                                                                                   | Feasibility/pilot study                                 | Brazil        | Hypertension, diabetes, with<br>depressive symptoms          | 66                             | Sub-optimal           |

|                     |                                                                                                                                                                                                    |                             |          |                               |                          |             |
|---------------------|----------------------------------------------------------------------------------------------------------------------------------------------------------------------------------------------------|-----------------------------|----------|-------------------------------|--------------------------|-------------|
| Pichayapinyo P 2019 | Feasibility study of automated interactive voice response telephone calls with community health nurse follow-up to improve glycaemic control in patients with type 2 diabetes                      | Quasi-experiment (pre-post) | Thailand | Type-2 diabetes               | 35 patients and 6 nurses | Sub-optimal |
| Prabhakaran D 2019  | Effectiveness of an mHealth-Based Electronic Decision Support System for Integrated Management of Chronic Conditions in Primary Care: The mWellcare Cluster-Randomized Controlled Trial            | Cluster-RCT                 | India    | Hypertension, type-2 diabetes | 3,698                    | Good        |
| Silveira DV 2019    | Development and Evaluation of a Mobile Decision Support System for Hypertension Management in the Primary Care Setting in Brazil: Mixed-Methods Field Study on Usability, Feasibility, and Utility | Feasibility/pilot study     | Brazil   | Hypertension                  | 10 family physicians     | Sub-optimal |
| Debon R 2020        | Effects of using a mobile health application on the health conditions of patients with arterial hypertension: A pilot trial in the context of Brazil's Family Health Strategy                      | Feasibility/pilot study     | Brazil   | Hypertension                  | 39                       | Sub-optimal |
| Güner T. A. 2020    | The effect of diabetes education and short message service reminders on metabolic control and disease management in patients with type 2 diabetes mellitus                                         | Quasi-experiment (pre-post) | Turkey   | Type-2 diabetes               | 101                      | Sub-optimal |
| Lee JY 2020         | Telemonitoring and Team-Based Management of Glycemic Control on People with Type 2 Diabetes: a Cluster-Randomized Controlled Trial                                                                 | Cluster-RCT                 | Malaysia | Type-2 diabetes               | 240                      | Good        |
| Montrivade S 2020   | Hypertension Subtypes among Thai Hypertensives: An Analysis of Telehealth-Assisted Instrument in Home Blood Pressure Monitoring Nationwide Pilot Project                                           | Feasibility/pilot study     | Thailand | Hypertension                  | 1,184                    | Sub-optimal |
| Yan LL 2021         | Effectiveness of a primary care-based integrated mobile health intervention for stroke management in rural China (SINEMA): A cluster-randomized controlled trial                                   | Cluster-RCT                 | China    | Stroke                        | 1,250                    | Good        |
